# Supplementary material
Source: publisher figshare collection journal article supplement (https://sage.figshare.com/ndownloader/files/22676510)
Supplement: Supplementary file 1 [file 22676510]

---

DrugInteractionProbabilityScale(DIPS)

---

April 01, 2020 - 10:44

1. Are there previous credible reports of this interaction in humans? : Yes [ 1 ]
2. Is the observed interaction consistent with the known interactive properties of precipitant drug? : Yes [ 1 ]
3. Is the observed interaction consistent with the known interactive properties of object drug? : Yes [ 1 ]
4. Is the event consistent with the known or reasonable time course of the interaction ? : Yes [ 1 ]
5. Did the interaction remit upon dechallenge of the precipitant drug with no change in the object drug? : UNK or N/A [ 0 ]
6. Did the interaction reappear when the precipitant drug was readministered in the presence of continued use : UNK or N/A [ 0 ]  
of object drug?
7. Are there reasonable alternative causes for the event? : No [ 1 ]
8. Was the object drug detected in the blood or other fluids in concentrations consistent with the proposed : UNK or N/A [ 0 ]  
interaction?
9. Was the drug interaction confirmed by any objective evidence consistent with the effects on the object drug ? : UNK or N/A [ 0 ]
10. Was the interaction greater when the precipitant drug dose was increased or less when the dose was : UNK or N/A [ 0 ]  
decreased?

Score: 5

PROBABLE Drug Interaction

REFERENCE: Horn JR, Hansten PD, Chan LN. Proposal for a new tool to evaluate drug interaction cases. Ann Pharmacother. 2007;41(4):674-80.

PMID: 17389673 (<http://www.ncbi.nlm.nih.gov/pubmed/17389673>)
